# Supplementary material
Source: Research Square preprint supplement (doi:10.21203/rs.3.rs-10199134/v1)
Supplement: Supplementary file 1 [file f4104b4a1a322d3bf7448258.docx]

Table S1: Limit of detection, wavelength, and recovery rate of the inductively coupled plasma spectrometer for different elements

| **Metal** | **Al** | **As** | **Cd** | **Co** | **Cr** | **Cu** | **Fe** | **Hg** | **Ni** | **Pb** | **Zn** |
| --- | --- | --- | --- | --- | --- | --- | --- | --- | --- | --- | --- |
| LOD(mg/kg) | 0.001 | 0.014 | 0.003 | 0.001 | 0.015 | 0.20 | 0.099 | 0.00037 | 0.001 | 0.01 | 0.01 |
| LOQ (mg/kg) | 0.003 | 0.034 | 0.11 | 0.004 | 0.047 | 0.7L1 | 0.0171 | 0.0012 | 0..0037 | 0.034 | 0.034 |
| Wavelength (nm) | 396.15 | 189.04 | 214.43 | 228.6 | 267.71 | 327.39 | 259.94 | 184.95 | 231.6 | 220.35 | 213.85 |
| Recovery(%) | 100.47 | 82.27 | 97.15 | 95.96 | 97.85 | 95.26 | 95.57 | 80.56 | 94.72 | 93 | 86.12 |

Table S2: Health risk assessment indices and variables based on the EPA model

| **Variables** | **Definition** | **Unit** | **Value** | Refrences |
| --- | --- | --- | --- | --- |
| C | Concentration | mg/kg | Table 1 |  |
| IR | Milk Intake Rate | kg/day | Adult=0.06, Child= 0.03 | (Statistics 2016) |
| EF | Exposure Frequency | Days/Year | 365 | (USEPA 2011) |
| ED | Exposure Duration | Year | Adult=70, Child= 6 |
| BW | Body Weight | kg | Adult=70, Child= 20 |
| AT | Average Time | Days | Adult=25550, Child= 2190 |
| EDI | Estimated Daily Intake | mg/kg/day | Table 2 |  |
| RfD | Oral Reference Dose | mg/kg/day | As=0.0003, Cd=0.001, Al=0.7, Co=0.0004, Cu=0.04, Fe=0.7, Hg=0.0004, Zn=0.3, Cr=0.003, Ni=0.02, Pb=0.0035, Ba= 0.07 | (USEPA 2011) |
| OSF | Oral Slope Factor | mg/kg/day-1 | As=1.5, Pb=0.0085, Cd=0.38, Hg=0.0003 |
| HQ | Hazard Quotient | THQ indicates a possible non-carcinogenic risk to toxic elements | Table 3 | (USEPA 2001, EPA 2005) |
| HI | Hazard Index | HI < 1 indicating no non-carcinogenic risk from exposure to toxic elements/ HI > 1 indicating possible non-carcinogenic risk | Table 3 |
| CR | Cancer Risk | CR < 10-4 indicating carcinogenic risk from exposure to toxic elements/ CR > 10-4 indicating possible carcinogenic risk | Table 4 | (USEPA 2011) |

Table S3: Heavy metal levels in low-fat and whole-fat pasteurized milk

| seasons | **Heavy metals levels *(mg/L)*** | | | | | | | | | | |
| --- | --- | --- | --- | --- | --- | --- | --- | --- | --- | --- | --- |
| **Al** | **As** | **Al** | **Co** | **Al** | **Cu** | **Al** | **Hg** | **Al** | **Pb** | **Al** |
| **low-fat milk,** *n= 108 (1% fat)* | 0.099±0.11 | 0.058±0.044 | ND | 0.001* | 0.066±0.04 | 0.17±0.11 | 0.13±0.11 | 0.035±0.006 | 0.076±0.033 | 0.049±0.021 | 3.25±0.49 |
| **Whole fat milk**  *n= 108 (5% fat)* | 0.10±0.11 | 0.051±0.017 | ND | 0.013±0.007 | 0.071±0.041 | 0.21±0.22 | 0.19±0.17 | 0.034±0.006 | 0.096±0.034 | 0.098±0.10 | 3.20±0.57 |
| **Total**  **(n=216)** | 0.10±0.11 | 0.054±0.033 | ND | 0.012±0.008 | 0.069±0.041 | 0.19±0.17 | 0.16±0.14 | 0.035±0.006 | 0.087±0.034 | 0.067±0.065 | 3.23±0.53 |
| **bp-value** | 0.73 | 0.43 | - | 0.11 | 0.46 | 0.66 | 0.10 | 0.72 | 0.21 | 0.45 | 0.24 |

ND: not detected  N: sample size, * Items that have been detected only once in the measurements; therefore, it is not possible to calculate the standard deviation., ±: standard deviation, b: Statistically significant difference between the concentration of heavy metals in low-fat and whole-fat milk was done using the Mann-Whitney test.

Table S4: Heavy metals levels in in different commercial brands pasteurized milk

| **Brands** | **Heavy metals levels *(mg/L)*** | | | | | | | | | | |
| --- | --- | --- | --- | --- | --- | --- | --- | --- | --- | --- | --- |
| **Al** | **As** | **Cd** | **Co** | **Cr** | **Cu** | **Fe** | **Hg** | **Ni** | **Pb** | **Zn** |
| **A** | 0.094±0.090 | 0.055±0.013 | ND | ND | 0.060±0.037 | 0.22±0.12 | 0.12±0.12 | 0.031±0.004 | 0.059±0.031 | 0.041±0.004 | 3.35±0.61 |
| **B** | 0.046±0.058 | 0.046±0.014 | ND | 0.014* | 0.059±0.034 | 0.23±0.18 | 0.16±0.11 | 0.034±0.004 | 0.12* | 0.042* | 3.12±0.37 |
| **C** | 0.10±0.089 | 0.056±0.019 | ND |  | 0.084±0.035 | 0.18±0.19 | 0.19±0.18 | 0.039±0.012 | 0.076±0.027 | 0.13±0.10 | 3.40±0.7 |
| **D** | 0.10±0.094 | 0.078±0.095 | ND | 0.014±0.001 | 0.067±0.038 | 0.16±0.055 | 0.13±0.067 | 0.034±0.004 | 0.15* | 0.036±0.016 | 3.03±0.42 |
| **E** | 0.14±0.091 | 0.062±0.022 | ND | 0.006±0.008 | 0.068±0.045 | 0.19±0.065 | 0.26±0.27 | 0.036±0.002 | 0.095* | ND | 3.51±0.37 |
| **F** | 0.099±0.091 | 0.047±0.018 | ND | 0.012* | 0.065±0.038 | 0.19±0.15 | 0.16±0.13 | 0.032±0.007 | 0.035±0.028 | ND | 3.17±0.40 |
| **G** | 0.066±0.076 | 0.047±0.016 | ND | 0.02±0.011 | 0.079±0.048 | 0.10±0.035 | 0.15±0.092 | 0.036±0.008 | 0.11±0.002 | 0.045* | 3.093±0.43 |
| **H** | 0.095±0.096 | 0.049±0.018 | ND | 0.017* | 0.069±0.047 | 0.19±0.22 | 0.13±0.097 | 0.033±0.006 | 0.12* | ND | 3.34±0.54 |
| **I** | 0.17±0.22 | 0.051±0.011 | ND | ND | 0.071±0.048 | 0.23±0.35 | 0.14±0.084 | 0.037±0.001 | 0.09±0.023 | 0.055* | 3.039±0.71 |
| **ap-value** | 0.68 | 0.48 | - | 0.56 | 0.55 | 0.06 | 0.78 | 0.90 | 0.12 | 0.21 | 0.095 |

ND: not detected, * Items that have been detected only once in the measurements; therefore, it is not possible to calculate the standard deviation., ±: standard deviation, a: Statistically significant difference between the concentration of heavy metals in different commercial brands was determined using Kruskal-Wallis tests.

| 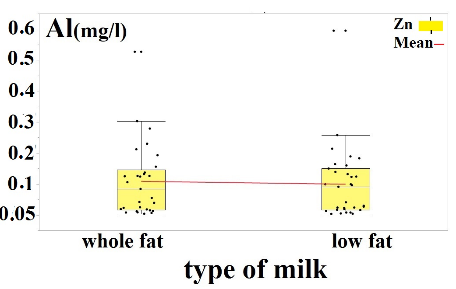 | 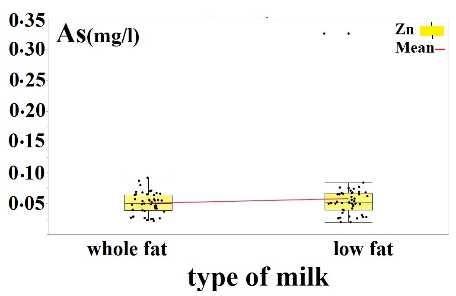 | 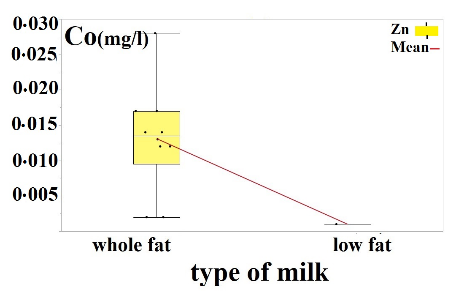 |
| --- | --- | --- |
| 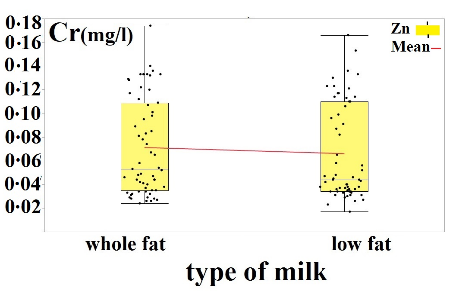 | 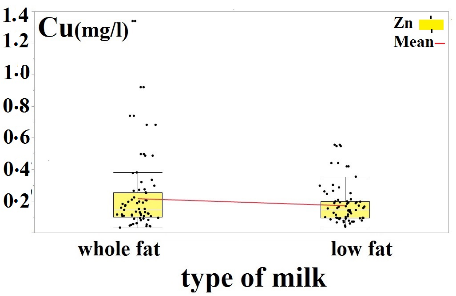 | 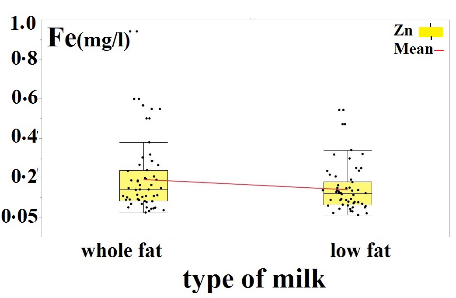 |
| 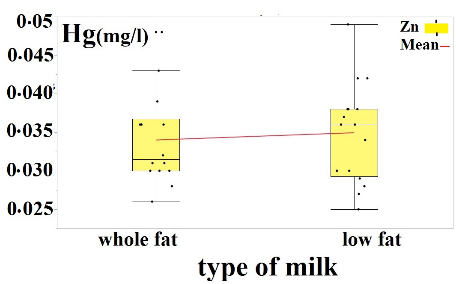 | 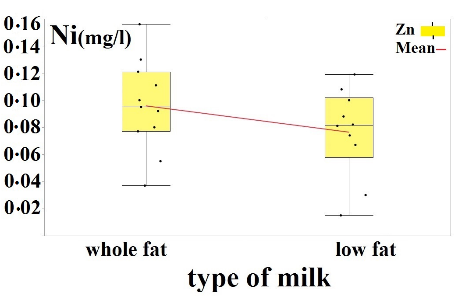 | 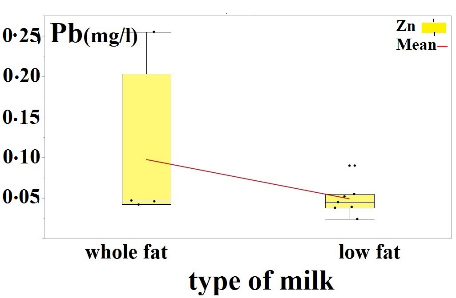 |
| 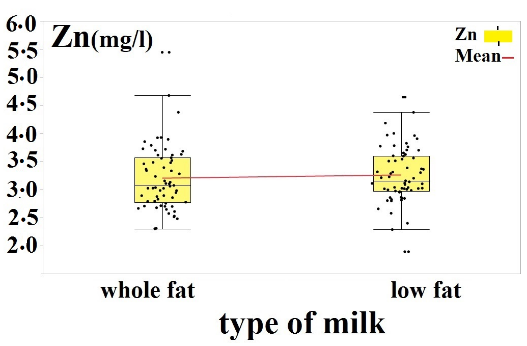 | | |

Fig S1: Heavy metals levels in low-fat and whole fat pasteurized milk
