# Supplementary material
Source: Research Square preprint supplement (doi:10.21203/rs.3.rs-10199134/v1)
Supplement: Supplementary file 2 [file f970f533b59f9233a25082d5.docx]

**Table 3: hazard index (HI) HI and hazard quotient (THQ) values of heavy metals in child and adults through pasteurized milk Consumption**

| **Metals** | **Seasons** | | | | | | | |
| --- | --- | --- | --- | --- | --- | --- | --- | --- |
| **winter** | | **Spring** | | **Summer** | | **Autumn** | |
| **child** | **adult** | **child** | **adult** | **child** | **adult** | **child** | **adult** |
| **Al** | 0.0005±0.0003 | 0.0002±0.0001 | 0.0005±0.0005 | 0.00022±0.0002 | 0.000054±0.00004 | 0.000026±0.00002 | 0.0004±0.00015 | 0.0002±0.00007 |
| **As** | 0.3±0.06 | 0.1±0.03 | 0.4±0.26 | 0.2±0.1 | 0.24±0.14 | 0.1±0.07 | ND | ND |
| **Co** | 0.06±0.01 | 0.03±0.005 | 0.1* | 0.06* | 0.0075±0.0026 | 0.0036±0.001 | 0.06±0.0064 | 0.03±0.003 |
| **Cr** | 0.0001±0.00002 | 0.00007±0.00001 | 0.00005±0.00003 | 0.000024±0.00001 | 0.00006±0.00002 | 0.000027±0.00001 | 0.00006±0.00004 | 0.00003±0.000018 |
| **Cu** | 0.01±0.004 | 0.005±0.002 | 0.006±0.003 | 0.003±0.001 | 0.004±0.002 | 0.002±0.0009 | 0.02±0.015 | 0.01±0.007 |
| **Fe** | 0.0006±0.0003 | 0.0003±0.0001 | 0.0003±0.0005 | 0.0002±0.0002 | 0.0003±0.0003 | 0.0002±0.0002 | 0.0005±0.0004 | 0.0003±0.0002 |
| **Hg** | 0.15±0.03 | 0.07±0.01 | ND | ND | ND | ND | ND | ND |
| **Ni** | 0.0003* | 0.0002* | 0.0008±0.0009 | 0.0004±0/.00004 | ND | ND | 0.0008±0.0004 | 0.0004±0.0002 |
| **Pb** | ND | ND | 0.01* | 0.006* | 0.036±0.034 | 0.018±0.016 | ND | ND |
| **Zn** | 0.02±0.003 | 0.01±0.001 | 0.02±0.001 | 0.009±0.0006 | 0.02±0.002 | 0.008±0.0009 | 0.02±0.004 | 0.008±0.002 |
| **HI** | 0.52 | 0.25 | 0.58 | 0.27 | 0.30 | 0.14 | 0.09 | 0.04 |

PTDI values: Fe(0.8 mg/kg BW/day); Al(0.14 mg/kg BW/day); Ni(0.3 mg/kg BW/day); Cu(0.5 mg/kg BW/day); Pb(0.0035mg/kg BW/day); Zn(1 mg/kg BW/day); Hg(0.00057 mg/kg BW/day) (for inorganic mercury); Cd(0.0008 mg/kg BW/day); Co(0.005 to 0.04); Cr(0.05 to 0.2 ); As(0.0021 mg/kg BW/day); ND: not detected, ±: standard deviation, * Items that have been detected only once in the measurements, therefore, it is not possible to calculate the standard deviation
